# Supplementary material for: Positioning dependent anion recognition by thiourea-based chromoionophores via hydrogen bonding in aqueous vesicle solutions
Source: Royal Society of Chemistry journal article supplement (doi:10.1039/a909758i), 2000-01-01

**Supplementary Information**

Title: Positioning dependent anion recognition by thiourea-based chromoionophores *via* hydrogen bonding in aqueous vesicle solution

Author: Takashi Hayashita, Tsunenobu Onodera, Ryo Kato, Seiichi Nishizawa and Norio Teramae

**Response profiles of Cn-TU in DDAB solution:**

The response profiles of **Cn-TU** upon addition of Cl- in **DDAB** solution have been examined (Fig. A). It is evident that the absorbance change (Abs) increases from **C8-TU** to **C6-TU** to **C4-TU**, and then the sigmoidal response becomes clear from **C4-TU** to **C2-TU** to **C1-TU**. These response profiles can be explained by the successive reaction mechanism shown in eq. (A-1), in which Cl- ions first bind on the surface of vesicle followed by complexing with **Cn-TU** inside **DDAB**.

From eq. (A-1), the spectral response (Abs) is expressed by the following equation,

where Aand A0 are the absorbance of **Cn-TU** at [Cl-] = and [Cl-] = 0, respectively.

The solid lines in Fig. A are the theoretical curves based on eq. (A-2), and the n value, which is ascribed to the binding number of Cl- on the surface of vesicle required for the **Cn-TU**.Cl- complex formation, is determined from the curve fitting analysis. The results are shown in Fig. B together with the max changes of **Cn-TU** in **DDAB** solution (see Fig. 2 in the manuscript). The binding number (n) clearly increses with decreasing the alkyl chain length of **Cn-TU**, indicating that the larger binding number of Cl- is required to penetrate through the vesicle interface and bind with **Cn-TU** located deep inside the **DDAB** vesicle. These results are the additional supporting information that the positioning of chromophore binding sites in **DDAB** is successfully controlled by the alkyl chain length of **Cn-TU**.

S-1


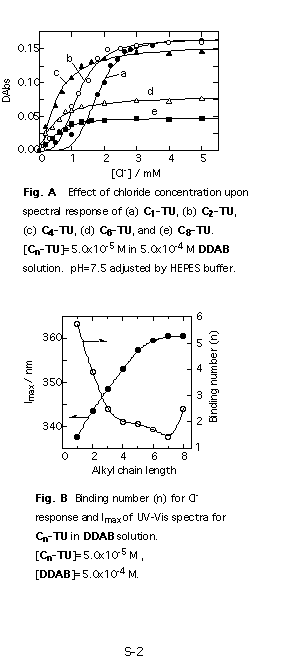

Supplement: a909758i.doc [file a909758i.doc]
